# Supplementary material
Source: MDPI journal article supplement (https://www.mdpi.com/2071-1050/12/23/9858)
Supplement: s1 [file s1]

**Supplementary Materials:** List of excluded articles and exclusion criteria (with a \* those who were not located)

| Excluded article<br>(first author, title, year)                                                                                                                                                                                                                                 | Exclusion criteria                     |                                                     |                              |
|---------------------------------------------------------------------------------------------------------------------------------------------------------------------------------------------------------------------------------------------------------------------------------|----------------------------------------|-----------------------------------------------------|------------------------------|
|                                                                                                                                                                                                                                                                                 | Not addressed to teachers or educators | Not about sustainability or sustainable development | Not a competence s framework |
| [No author name available], "ASCILITE 2012 -Annual conference of the Australian Society for Computers in Tertiary Education", 2012.                                                                                                                                             |                                        | 1                                                   |                              |
| [No author name available], "Informatics in Schools: Sustainable Informatics Education for Pupils of all Ages - 6th International Conference on Informatics in Schools: Situation, Evolution, and Perspectives, ISSEP 2013, Proceedings", 2013.                                 |                                        | 1                                                   |                              |
| [No author name available], "International Conference on Knowledge Society: Technology, Sustainability and Educational Innovation, TSIE 2019", 2020.                                                                                                                            |                                        |                                                     | 1                            |
| [No author name available], "Proceedings of the International Conference on Computers in Education 2005: ""Towards Sustainable and Scalable Educational Innovations Informed by the Learning Sciences"" - Sharing Research Results and Exemplary Innovations, ICCE 2005", 2005. |                                        | 1                                                   |                              |
| Abereijo I.O., "Entrepreneurship education: Opportunities, challenges and future directions", 2018.                                                                                                                                                                             |                                        | 1                                                   |                              |
| Abildsnes E., Stea T.H., Berntsen S., Omfjord C.S., Rohde G., "Physical education Teachers' and public health Nurses' perception of Norwegian high school Students' participation in physical education - a focus group study", 2015.                                           |                                        | 1                                                   |                              |
| Abou- Warda S.H., "New educational services development: Framework for technology entrepreneurship education at universities in Egypt", 2016.                                                                                                                                   |                                        | 1                                                   |                              |
| Abro S.R., Cuper J., "Hands- on manufacturing engineering - An analytical study", 2011.                                                                                                                                                                                         |                                        | 1                                                   | 1                            |
| Adams D., "Lifelong learning skills and attributes: The perceptions of Australian secondary school teachers", 2007.                                                                                                                                                             | 1                                      | 1                                                   |                              |
| Ahmed S., Sclafani A., Aquino E., Kala S., Barias L., Eeg J., "Building student capacity to lead sustainability transitions in the food system through farm-based authentic research modules in sustainability sciences (FARMS)", 2017.                                         | 1                                      |                                                     | 1                            |
| *Allan M., Chisholm C.U., "Achieving Engineering Competencies in the Global Information Society through the Integration of On-Campus and Workplace Environments", 2008.                                                                                                         |                                        |                                                     |                              |
| Allan M., Chisholm C.U., "The development of competencies for engineers within a global context""2008.                                                                                                                                                                          | 1                                      |                                                     | 1                            |
| Allen S.S., Miller J., Ratner E., Santilli J., "The educational and financial impact of using patient educators to teach introductory physical exam skills", 2011.                                                                                                              |                                        | 1                                                   |                              |
| Alsina Á., Mulà I., "Advancing towards a transformational professional competence model through reflective learning and sustainability: The case of mathematics teacher education", 2019.                                                                                       |                                        |                                                     | 1                            |
| Álvarez-Nieto C., Richardson J., Parra-Angueta G., Linares-Abad M., Huss N., Grande-Gascón M.L., Grose J., Huynen M., López-Medina I.M., "Developing digital educational materials for nursing and sustainability: The results of an observational study", 2018.                | 1                                      |                                                     |                              |
| Andenoro A.C., Bletscher C.G., "Transforming the international learning experience for students: Moving beyond the principle of accompaniment", 2012.                                                                                                                           | 1                                      |                                                     | 1                            |
| Anderson C.I., Gupta R.N., Larson J.R., Abubars O.I., Kwiecien A.J., Lake A.D., Hozain A.E., Tanious A., O'Brien T., Basson M.D., "Impact of objectively assessing surgeons' teaching on effective perioperative instructional behaviors", 2013.                                |                                        | 1                                                   |                              |
| *Andić D., Vorkapić S.T., "Interdisciplinary approaches to sustainable development in higher education: A case study from Croatia", 2014.                                                                                                                                       |                                        |                                                     |                              |

|                                                                                                                                                                                                                                                                     |   |   |   |
|---------------------------------------------------------------------------------------------------------------------------------------------------------------------------------------------------------------------------------------------------------------------|---|---|---|
| Andrews J., Meadows L., Oguntebi J., "Engineering graduate students: Engaging today's teachers, training tomorrow's scientists and engineers, and opening new academic and career paths for K-12 students", 2008.                                                   |   | 1 |   |
| Andrews M., Brewer M., Buchan T., Denne A., Hammond J., Hardy G., Jacobs L., McKenzie L., West S., "Implementation and sustainability of the nursing and midwifery standards for mentoring in the UK", 2010.                                                        | 1 |   | 1 |
| Angelini D.J., O'Brien B., Singer J., Coustan D.R., "Midwifery and Obstetrics. Twenty Years of Collaborative Academic Practice.", 2012.                                                                                                                             |   | 1 |   |
| Aqlan F., Dunsworth Q., Ford M.R., George Walters E., III, Resig J., "A program to improve manufacturing learning using simulation and automation", 2019.                                                                                                           |   | 1 | 1 |
| Arati D., Todorova A., Merrett R., "Implementation and sustainability of a global ICT company's programme to help teachers integrate technology into learning and teaching in Germany, France and the UK", 2011.                                                    |   | 1 |   |
| *Araújo Álvarez R., Lorenzo Rial M.A., Varela Losada M., Álvarez Lires M.M., "Educating in sustainable development: The contents of gender and environment [Educando en desarrollo sustentable: El índice de género y medioambiente]", 2015.                        |   |   |   |
| Archbold S., O'Donoghue G.M., "Ensuring the long-term use of cochlear implants in children: The importance of engaging local resources and expertise", 2007.                                                                                                        |   | 1 |   |
| Armstrong G., Headrick L., Madigosky W., Ogrinc G., "Designing education to improve care", 2012.                                                                                                                                                                    |   | 1 |   |
| Arora A.S., "The ""organization"" as an interdisciplinary learning zone: Using a strategic game to integrate learning about supply chain management and advertising", 2012.                                                                                         |   | 1 | 1 |
| Arsat M., Holgaard J.E., De Graaff E., "Effectiveness of sustainability in engineering education: Research methods", 2012.                                                                                                                                          | 1 |   |   |
| Asif T., Guangming O., Haider M.A., Colomer J., Kayani S., ul Amin N., "Moral education for sustainable development: Comparison of university teachers' perceptions in China and Pakistan", 2020.                                                                   |   |   | 1 |
| *Aubrecht K.B., Bourgeois M., Brush E.J., Mackellar J., Wissinger J.E., "Integrating Green Chemistry in the Curriculum: Building Student Skills in Systems Thinking, Safety, and Sustainability", 2019.                                                             |   |   |   |
| Azcárate P., Navarrete A., García E., "Approach to the level of inclusion of sustainability in university curricula [Aproximación al nivel de inclusión de la sostenibilidad en los curricula universitarios]", 2012.                                               |   |   | 1 |
| Bacon R., Kellett J., Dart J., Knight-Agarwal C., Mete R., Ash S., Palermo C., "A Consensus Model: Shifting assessment practices in dietetics tertiary education", 2018.                                                                                            |   | 1 |   |
| *Bain Y., Brosnan K., McGuigan A., "Transforming practice, transforming practitioners: reflections on the TQFE in Scotland", 2019.                                                                                                                                  |   | 1 |   |
| Baker C.M., Rilett L.R., Kunz G.M., Nugent G.C., "Roads, rails and race cars: A STEM educational program for 4 th-12th grade students", 2014.                                                                                                                       |   | 1 |   |
| Baldissera P., Delprete C., "Human powered vehicle design: A challenge for engineering education", 2014.                                                                                                                                                            | 1 |   | 1 |
| Baldwin C.D., Chandran L., Gusic M.E., "Building sustainable professional development programs: Applying strategies from implementation science to translate evidence into practice", 2017.                                                                         |   | 1 |   |
| Barakabitze A.A., William-Andey Lazaro A., Ainea N., Mkwizu M.H., Maziku H., Matofali A.X., Iddi A., Sanga C., "Transforming African Education Systems in Science, Technology, Engineering, and Mathematics (STEM) Using ICTs: Challenges and Opportunities", 2019. |   | 1 |   |
| Barakat N., Plouff C., "A model for on-line education of ABET-required professional aspects of engineering", 2014.                                                                                                                                                  | 1 |   |   |
| Barraza L., Castaño C., "Can science education help to build a sustainable society? [Puede la enseñanza de la ciencia ayudar a construir una sociedad sostenible?]", 2012.                                                                                          |   |   | 1 |
| Barrett J., Hodgson J., "Hospital simulated patient programme: A guide", 2011.                                                                                                                                                                                      |   | 1 |   |
| Basantes-Andrade A., Cabezas-González M., Casillas-Martín S., "Digital Competences in e-learning. Case Study: Ecuador", 2020.                                                                                                                                       |   | 1 |   |
| *Bauermeister M.L., Diefenbacher L.H., "Beyond Recycling: Guiding Preservice Teachers to Understand and Incorporate the Deeper Principles of Sustainability", 2015.                                                                                                 |   |   |   |

|                                                                                                                                                                                                                                                                                                                                       |   |   |   |
|---------------------------------------------------------------------------------------------------------------------------------------------------------------------------------------------------------------------------------------------------------------------------------------------------------------------------------------|---|---|---|
| Bedford D., Garcia-Perez A., Georgieff M., Brown-Grant J., "Knowledge management education standards: Developing practical guidance", 2018.                                                                                                                                                                                           | 1 |   |   |
| Bedford D.A.D., Georgieff M., Brown-Grant J., "Lifewide, lifelong comprehensive approach to knowledge management education – emerging standards", 2017.                                                                                                                                                                               | 1 |   |   |
| Bekaroo G., Bokhoree C., Ramsamy P., Moedeen W., "Investigating personal carbon emissions of employees of higher education institutions: Insights from Mauritius", 2019.                                                                                                                                                              |   |   | 1 |
| Bellini D., Crescentini A., Zanolli G., Cubico S., Favretto G., Faccincani L., Ardolino P., Ganesini G., "Mathematical Competence Scale (MCS) for primary school: The psychometric properties and the validation of an instrument to enhance the sustainability of talents development through the numeracy skills assessment", 2019. | 1 |   |   |
| Belu R.G., Chiou R., Ghaisas K., Tseng T.-L.B., "Teaching renewable energy systems design and analysis with HOMER", 2014.                                                                                                                                                                                                             | 1 |   | 1 |
| Belu R.G., Chiou R., Tseng T.-L.B., Cioca L.I., "Teaching renewable energy system design and analysis with HOMER", 2014.                                                                                                                                                                                                              | 1 |   | 1 |
| Benton G., "Global awareness, global stewardship and the greening of maritime education", 2020.                                                                                                                                                                                                                                       | 1 |   |   |
| Besong F., Holland C., "The Dispositions, Abilities and Behaviours (Dab) Framework for Profiling Learners' Sustainability Competencies in Higher Education", 2015.                                                                                                                                                                    | 1 |   |   |
| Bezudnaya A.G., Ksenofontova T.Y., Razumovsky V.M., Zinchik N., Iudin D.S., "Evaluation of youth competence in the field of sustainable development: Lifecycle approach", 2018.                                                                                                                                                       | 1 |   |   |
| Bielefeldt A.R., Morse A.N., "Teaching and assessment of innovation and creativity in civil engineering: Why? How? Now!", 2019.                                                                                                                                                                                                       | 1 |   |   |
| Birdsal S., "Empowering students to act: Learning about, through and from the nature of action", 2010.                                                                                                                                                                                                                                | 1 |   |   |
| Blatti J.L., Garcia J., Cave D., Monge F., Cuccinello A., Portillo J., Juarez B., Chan E., Schwebel F., "Systems Thinking in Science Education and Outreach toward a Sustainable Future", 2019.                                                                                                                                       | 1 |   |   |
| Boehnert J.J., "Transformative learning in sustainable design education", 2011.                                                                                                                                                                                                                                                       | 1 |   |   |
| Böhm M., Eggert S., Barkmann J., Bögeholz S., "Evaluating sustainable development solutions quantitatively: Competence modelling for GCE and ESD", 2016.                                                                                                                                                                              | 1 |   |   |
| Bokhoree C., Jheengut A., Bholah R., "Environmental clubs as vehicles for promoting education for environmental sustainability in Mauritian secondary schools", 2012.                                                                                                                                                                 |   |   | 1 |
| Boldureanu G., Ionescu A.M., Bercu A.-M., Bedrule-Grigoruță M.V., Boldureanu D., "Entrepreneurship education through successful entrepreneurial models in higher education institutions", 2020.                                                                                                                                       | 1 |   |   |
| Bonora L., Martelli F., Marchi V., Vagnoli C., "Gamification as educational strategy for STEM learning: DIGITgame project a collaborative experience between Italy and Turkey high schools around the Smartcity concept.", 2019.                                                                                                      |   |   | 1 |
| Boukelif A., Sabrina M., Aiboud F.F., Mammeria A.B., Hasnia M., Cherradi M., Cherni B., Hadjer S., "Teaching and learning sustainably with web 2.0 technologies", 2017.                                                                                                                                                               | 1 |   |   |
| Bratitsis T., Meireles G., Neto C., "WeAreEurope: An online game for European citizenship education for primary school", 2017.                                                                                                                                                                                                        | 1 | 1 |   |
| *Braun-Wanke K., "Learning and teaching for a sustainable future", 2017.                                                                                                                                                                                                                                                              |   |   |   |
| Brebner C., Attrill S., Marsh C., Coles L., "Facilitating children's speech, language and communication development: An exploration of an embedded, service-based professional development program", 2017.                                                                                                                            | 1 |   |   |
| Brendel N., "(How) do students reflect on sustainability?: A model to diagnose and foster reflective thinking about sustainability", 2019.                                                                                                                                                                                            |   |   | 1 |
| Brindesi H., Diakonou M.K., Tsantilas S., Kapidakis S., "Building an information literacy program for high school students of Greece in close cooperation with a local special library", 2015.                                                                                                                                        | 1 |   |   |
| Brooks B., Blackley D., Masters P., May A.S., Mayes G., Williams C., Pack R., "Developing an academic health department in northeast Tennessee: A sustainable approach through student leadership", 2014.                                                                                                                             | 1 | 1 | 1 |
| Browder M., Czuchry A.J., Boughers L., Deutsch C., Muehl N., "A strategic engineering management approach to innovation and organizational sustainability: An addition to the engineering management curriculum?", 2014.                                                                                                              | 1 |   | 1 |

|                                                                                                                                                                                                                                                         |   |   |
|---------------------------------------------------------------------------------------------------------------------------------------------------------------------------------------------------------------------------------------------------------|---|---|
| Brumfitt A., Berenguer Y., Wigbels L., Willikens P., Thompson L., "Space education and outreach symposium (E1.) structures for space education (2.)",2008.                                                                                              | 1 |   |
| Bun?iau C.M., Stoian A.C., "Assessing the intercultural competence of students in the romanian higher-education environment",2017.                                                                                                                      | 1 |   |
| Butler D., Leahy M., Hallissy M., Brown M., "Embedding classroom practice in a 21st Century Learning Design (21CLD) MOOC framework",2016.                                                                                                               | 1 |   |
| Butler J.I., Storey B., Robson C., "Emergent learning focused teachers and their ecological complexity worldview",2014.                                                                                                                                 | 1 |   |
| Caballero-García P.A., Tortajada E.G., Pilar Jiménez Martínez Ma., "Creativity, entrepreneurship and happiness: Ingredients for a high education change",2017.                                                                                          | 1 | 1 |
| Caetano N., Rocha J., Quadrado J.C., Cardoso J.M., Felgueiras M.C., "Teaching sustainability in a multicultural environment",2015.                                                                                                                      |   | 1 |
| Canada A.N., "Probing the relationship between evidence-based practice implementation models and critical thinking in applied nursing practice",2016.                                                                                                   | 1 |   |
| Candra Masrul A., Shen Z., Guo X., Sugihara K., Nishino T., "Feasibility study of mixed reality on education of design and planning students based on Bloom taxonomy",2019.                                                                             | 1 | 1 |
| Cantell H., Tolppanen S., Aarnio-Linnanvuori E., Lehtonen A., "Bicycle model on climate change education: presenting and evaluating a model",2019.                                                                                                      | 1 |   |
| Carayon P., "Human factors in patient safety as an innovation",2010.                                                                                                                                                                                    | 1 |   |
| Carson K.I., "Agricultural training and the labour productivity challenge",2018.                                                                                                                                                                        | 1 | 1 |
| Carter-Pokras O., Bereksyey S., Lie D., Braddock 3rd. C.H., National Consortium for Multicultural Education for Health Professionals, "Surmounting the unique challenges in health disparities education: a multi-institution qualitative study.",2010. | 1 |   |
| Castro-Spila J., Torres R., Lorenzo C., Santa A., "Social innovation and sustainable tourism lab: an explorative model",2018.                                                                                                                           |   | 1 |
| Caudle L.A., "Teachers and teaching: Global practices, challenges, and prospects",2018.                                                                                                                                                                 | 1 |   |
| Cepic R., Vorkapi? S.T., Lon?ari? D., Andi? D., Mihi, S. S. Considering transversal competences, personality and reputation in the context of the teachers' professional development",2015.                                                             |   | 1 |
| Chandra-Mouli V., Plesons M., Sullivan E., Gonsalves L., Say L., "38.8 million additional modern contraceptive users: This, in fact, is ""a never-before opportunity to strengthen investment and action on adolescent contraception""",2018.           | 1 |   |
| Chen J.J., Martin A., Erdosi-Mehaffey V., "The Process and Impact of the Infant/Toddler Credential as Professional Development: Reflections from Multiple Perspectives and Recommendations for Policy",2017.                                            | 1 |   |
| Chen L.C., Chen Y.-H., "Argument-driven inquiry in the information literacy instruction in Taiwan",2015.                                                                                                                                                | 1 |   |
| Cheng A., Grant V., Huffman J., Burgess G., Szyld D., Robinson T., Eppich W., "Coaching the Debrief",2017,.                                                                                                                                             | 1 |   |
| Cheng E., "Knowledge strategies for enhancing school learning capacity",2012.                                                                                                                                                                           | 1 |   |
| Chi Y., Qin Y., Song R., Xu H., "Knowledge graph in smart education: A case study of entrepreneurship scientific publication management",2018.                                                                                                          |   | 1 |
| Chinedu C.C., Wan Mohamed W.A., Ajah A.O., "A systematic review on education for sustainable development: Enhancing tve teacher training programme",2018.                                                                                               |   | 1 |
| Chiou R.Y., Belu R., Mauk M., Tseng T.-L., "Green energy manufacturing laboratory development for student learning experience on sustainability",2014.                                                                                                  | 1 | 1 |
| Chopra R., Joshi A., Nagarajan A., Fomproix N., Shashidhara L.S., "Climate Change Education Across the Curriculum",2019.                                                                                                                                |   | 1 |
| Chun A.M.S., Brisson I.E., "Ground Rules in Humanitarian Design",2015.                                                                                                                                                                                  | 1 | 1 |
| Cinque M., Bortoluzzi M., "Navigating complex challenges: Digital competence and personal knowledge management in university education to foster skills for lifelong learning",2013.                                                                    | 1 | 1 |

|                                                                                                                                                                                                                                                                                                                                                                     |   |   |   |
|---------------------------------------------------------------------------------------------------------------------------------------------------------------------------------------------------------------------------------------------------------------------------------------------------------------------------------------------------------------------|---|---|---|
| Cinque M., Bortoluzzi M., "Promoting digital skills and critical awareness through online search and personal knowledge management: A case study", 2013.                                                                                                                                                                                                            |   |   | 1 |
| Claramita M., Setiawati E.P., Kristina T.N., Emilia O., Van Der Vleuten C., "Community-based educational design for undergraduate medical education: A grounded theory study", 2019.                                                                                                                                                                                |   | 1 | 1 |
| *Collado-Ruano J., Morillo M.M., González F.J.A., "Education and good-living: Transdisciplinary skills for teachers training [Éducation et bien-vivre: Compétences transdisciplinaires pour la formation des enseignants]", 2019.                                                                                                                                   |   |   |   |
| Colon-Gonzalez M.C., El Rayess F., Guevara S., Anandarajah G., "Successes, challenges and needs regarding rural health medical education in continental Central America: a literature review and narrative synthesis", 2015.                                                                                                                                        |   | 1 |   |
| Colucci-Gray L., Perazzone A., Dodman M., Camino E., "Science education for sustainability, epistemological reflections and educational practices: From natural sciences to trans-disciplinarity", 2013.                                                                                                                                                            |   |   | 1 |
| Contreras M.F.S., Murga-Menoyo M.Á., "Place-based education: An approach for a sustainable curriculum in higher education [Place-based education: Une stratégie pour l'incorporation de la durabilité dans le curriculum de l'enseignement supérieur] [Place-based education: Una estrategia para la sostenibilización curricular de la educación superior]", 2019. |   |   | 1 |
| Corbett M.C., Mathenge W., Zondervan M., Astbury N., "Cascading training the trainers in ophthalmology across Eastern, Central and Southern Africa", 2017.                                                                                                                                                                                                          |   | 1 |   |
| Cotgrave A.J., Kokkarinen N., "Promoting sustainability literacy in construction students: Implementation and testing of a curriculum design model", 2011.                                                                                                                                                                                                          | 1 |   | 1 |
| Cotterell D., Hales R., Arcodia C., Ferreira J.-A., "Overcommitted to tourism and under committed to sustainability: the urgency of teaching "strong sustainability" in tourism courses", 2019.                                                                                                                                                                     | 1 |   | 1 |
| Coutinho A.J., Bhuyan N., Gits A., Alavi M., Ho T., Shiraki J., Dakis K., Jojola C., Stisher C.S., Ely P., "Student and resident involvement in family medicine for America's health: A step toward leadership development", 2019.                                                                                                                                  |   | 1 |   |
| Cowan C., Barrella E., Watson M.K., Anderson R., "Validating content of a sustainable design rubric using established frameworks", 2017.                                                                                                                                                                                                                            | 1 | 1 |   |
| Cundiff G.W., Geoffrion R., "An Assessment of the Continuing Surgical Education Program, a Surgical Preceptor Program for Faculty Members", 2016.                                                                                                                                                                                                                   |   | 1 |   |
| Dakers J.R., "The hegemonic behaviorist cycle", 2005.                                                                                                                                                                                                                                                                                                               |   |   | 1 |
| Dal Magro R., Pozzebon M., Schutel S., "Enriching the intersection of service and transformative learning with Freirean ideas: The case of a critical experiential learning programme in Brazil", 2020.                                                                                                                                                             |   | 1 |   |
| Dancz C.L.A., Ketchman K.J., Burke R., Mahmud R., Bilec M.M., Parrish K., Adams E.A., Allenby B., Landis A.E., "Integrating sustainability grand challenges and experiential learning into engineering curricula: Years 1 through 3", 2016.                                                                                                                         |   | 1 |   |
| Daubenmire P.L., van Opstal M.T., Hall N.J., Wunarb B., Kowrach N., "Using the chemistry classroom as the starting point for engaging urban high school students and their families in pro-environmental behaviors", 2017.                                                                                                                                          |   | 1 |   |
| Davini V., Marchionne I., Pandolfini E., "Generating a new idea of public mission for universities. a sustainable communication paradigm for community building", 2019.                                                                                                                                                                                             |   | 1 |   |
| Day S.W., Garcia J., Antillon F., Wilimas J.A., McKeon L.M., Carty R.M., de Alarcon P., Pui C.-H., Ribeiro R.C., Howard S.C., "A sustainable model for pediatric oncology nursing education in low-income countries", 2012.                                                                                                                                         |   | 1 |   |
| De Eyto A., "Growing oak trees'-education for sustainable design: Building a sustainable design literacy in undergraduate and professional designers", 2014.                                                                                                                                                                                                        |   |   | 1 |
| de Langen F.H.T., "Sustainability of Open Education through collaboration", 2018.                                                                                                                                                                                                                                                                                   |   | 1 |   |
| Deckard C., Marcarelli K., Benson S., McCormick H.M., "Breathing life into the science fair process", 2011.                                                                                                                                                                                                                                                         |   |   | 1 |
| Delphin E., Davidson M., "Teaching and evaluating group competency in systems-based practice in anesthesiology", 2008.                                                                                                                                                                                                                                              |   | 1 |   |

|                                                                                                                                                                                                                                                                                                                                                                                                   |   |   |   |
|---------------------------------------------------------------------------------------------------------------------------------------------------------------------------------------------------------------------------------------------------------------------------------------------------------------------------------------------------------------------------------------------------|---|---|---|
| Depešová J., Tureková I., "Implementation model of teaching practice with the application of a videoconference system", 2015.                                                                                                                                                                                                                                                                     |   |   | 1 |
| Desha C., Hargroves K., "Informing engineering education for sustainable development using ad deliberative dynamic model for curriculum renewal", 2011.                                                                                                                                                                                                                                           |   |   | 1 |
| Deutschlander S., Suter E., Lait J., "Models in interprofessional education: The IP enhancement approach as effective alternative", 2012.                                                                                                                                                                                                                                                         |   | 1 |   |
| Devaux A., Grand-Clement S., Manville C., Belanger J., "Digital learning's role in enabling inclusive skills development for a connected world", 2017,                                                                                                                                                                                                                                            |   | 1 |   |
| Di Giulio A., Defila R., ""Enabling university educators to equip students with inter- and transdisciplinary competencies", 2017.                                                                                                                                                                                                                                                                 |   | 1 |   |
| Dieleman H., Huisinigh D., "Games by which to learn and teach about sustainable development: exploring the relevance of games and experiential learning for sustainability", 2006.                                                                                                                                                                                                                | 1 |   | 1 |
| *Dieleman H., Juárez-Nájera M., "How can design education for sustainability? [¿cómo se puede diseñar educación para la sustentabilidad?]", 2008.                                                                                                                                                                                                                                                 |   |   |   |
| Djermanov J., Kostovic S., Kosanovic M., Egic B., Oljaca M., Djukic M., Borovica T., "Pedagogical reception of information and communication technology in education", 2011.                                                                                                                                                                                                                      |   | 1 |   |
| Dlouhá J., Burandt S., "Design and evaluation of learning processes in an international sustainability oriented study programme. in search of a new educational quality and assessment method", 2015.                                                                                                                                                                                             | 1 |   |   |
| Domingo J.M.C., Fernández J.C., Goded P.A., "A tool for analyzing the practical activities in initial training of secondary teachers of science and mathematics from the perspective of sustainability [Un instrumento para analizar las actividades prácticas en la formación inicial del profesorado de Secundaria de Ciencias y Matemáticas desde la perspectiva de la sostenibilidad]", 2015. |   |   | 1 |
| Dorsey R.J., Howard A.M., "Measuring the effectiveness of robotics activities in underserved K-12 communities outside the classroom", 2011.                                                                                                                                                                                                                                                       | 1 | 1 |   |
| Dorsey S., Gray C.L., Wasonga A.I., Amanya C., Weiner B.J., Belden C.M., Martin P., Meza R.D., Weinhold A.K., Soi C., Murray L.K., Lucid L., Turner E.L., Mildon R., Whetten K., "Advancing successful implementation of task-shifted mental health care in low-resource settings (BASIC): Protocol for a stepped wedge cluster randomized trial", 2020.                                          |   | 1 |   |
| Downey G., "Teaching reading with television: Constructing closed captioning using the rhetoric of literacy", 2010.                                                                                                                                                                                                                                                                               |   |   | 1 |
| Drachler H., Kicken W., Van Der Klink M., Stoyanov S., Boshuizen H.P.A., Barach P., "The Handover Toolbox: A knowledge exchange and training platform for improving patient care", 2012.                                                                                                                                                                                                          |   | 1 |   |
| Driscoll P., Rowe J.E., Thomae M., "The sustainable impact of a short comparative teaching placement abroad on primary school language teachers' professional, linguistic and cultural skills", 2014.                                                                                                                                                                                             |   | 1 |   |
| Dyson K., Kruger E., Tennant M., "A decade of experience evolving visiting dental services in partnership with rural remote Aboriginal communities", 2014.                                                                                                                                                                                                                                        | 1 | 1 | 1 |
| Egger A.E., Kastens K.A., Turrin M.K., "Sustainability, the next generation science standards, and the education of future teachers", 2017.                                                                                                                                                                                                                                                       |   |   | 1 |
| Ehlig-Economides C., Ezrailson C.M., Talreja R., "Reading, writing - Energy: An NSF CCLI project to enhance a freshman core curriculum natural science course", 2008.                                                                                                                                                                                                                             | 1 |   |   |
| Eilks I., "Science education and education for sustainable development - justifications, models, practices and perspectives", 2015.                                                                                                                                                                                                                                                               | 1 |   | 1 |
| Enoka I.S., Petrini M.A., Turale S., "Samoan Philosophy of Nursing: A basis for culturally proficient care and policy", 2014.                                                                                                                                                                                                                                                                     | 1 | 1 | 1 |
| Evans T.L., "Competencies and pedagogies for sustainability education: roadmap for sustainability studies program development in colleges and universities", 2019.                                                                                                                                                                                                                                | 1 |   |   |
| Farrell S., Cech E.A., Guerra R.C.C., Minerick A., Waidzunus T.J., "ASEE safe zone workshops and virtual community of practice to promote LGBTQ equality in engineering", 2016.                                                                                                                                                                                                                   |   | 1 |   |

|                                                                                                                                                                                                                                    |   |   |
|------------------------------------------------------------------------------------------------------------------------------------------------------------------------------------------------------------------------------------|---|---|
| Feather J.L., Aznar M.F., "Nanoscience education, workforce training, and K-12 resources", 2010.                                                                                                                                   | 1 | 1 |
| *Fehr M., "Overcoming Established Thinking Models: The Role of Engineering Education in Environmental Sustainability", 2003.                                                                                                       |   | 1 |
| Ferguson T., "Environmental and sustainability education in the Caribbean: Crucial issues, critical imperatives", 2020.                                                                                                            | 1 | 1 |
| Ferreira J.-A., Ryan L., Davis J., "Developing Knowledge and Leadership in Pre-Service Teacher Education Systems", 2015.                                                                                                           |   | 1 |
| Fortuin I.K.P.J., Bush S.R., "Educating students to cross boundaries between disciplines and cultures and between theory and practice", 2010.                                                                                      | 1 |   |
| Gadušová Z., Hašková A., Predanocytová L., "Teachers' professional competence and their evaluation", 2019.                                                                                                                         |   | 1 |
| Galt R.E., Parr D., Jagannath J., "Facilitating competency development in sustainable agriculture and food systems education: A self-assessment approach", 2013.                                                                   | 1 |   |
| Gama J.A.P., Caro R., Hernan C., Gomez C.L.C., Gomez G.H., Mena A.M., "Using input output leontief model in higher education based on knowledge engineering and fuzzy logic", 2016.                                                | 1 |   |
| Gapsalamov A., Akhmetshin E., Falyakhov I., Vasilev V., Sedov S., "Model of Scientific and Methodological Support for Training of Mentors for Vocational Education System in the Conditions of Digitalization", 2020.              |   | 1 |
| García Fernández B., Sánchez Emeterio G., "Conceptions and Perceptions of Primary School Teachers on Wetlands", 2017.                                                                                                              |   | 1 |
| Gayford C.G., "Environmental literacy: Towards a shared understanding for science teachers", 2002.                                                                                                                                 |   | 1 |
| Giannakopoulos P., Buckley S., "Do problem solving, critical thinking and creativity play a role in knowledge management? A theoretical mathematics perspective", 2009.                                                            |   | 1 |
| Gilbert L.A., Gross D.S., Kreutz K.J., "Developing undergraduate students' systems thinking skills with an InTeGrate module", 2019.                                                                                                | 1 |   |
| Gilmanshina S.I., Gayfullina A.Z., Fedotova N.R., Gilmanshin I.R., "Building the environmental literacy through school natural science education", 2018.                                                                           | 1 |   |
| Glazunova O., Voloshyna T., Korolchuk V., Parhomenko O., "Cloud-oriented environment for flipped learning of the future IT specialists", 2020                                                                                      | 1 |   |
| Goodchild T., "The evolution of pedagogy for non-traditional students at a UK higher education institution", 2016.                                                                                                                 |   | 1 |
| Goodman D., Fox P., Cowan D.J., "Educating engineers and technologists for a green/sustainable future", 2014.                                                                                                                      | 1 |   |
| Gordon L.V., Kavanagh L.D., Crump R., Heppel D., Fiori F., "Learning to Broaden the Impact of Health Resources through Public-Private Partnerships", 1998                                                                          |   | 1 |
| Govaerts S., Cao Y., Faltin N., Cherradi F., Gillet D., "Tutoring teachers - building an online tutoring platform for the teacher community", 2015.                                                                                |   | 1 |
| Greig A., Dawes D., Murphy S., Parker G., Loveridge B., "Program evaluation of a model to integrate internationally educated health professionals into clinical practice", 2013.                                                   |   | 1 |
| Guenaga M., Longarte J.K., Rayon A., "Standardized enriched rubrics to support competency-assessment through the SCALA methodology and dashboard", 2015.                                                                           |   | 1 |
| Guha I., Maliye C., Gupta S., Garg B., "Qualitative assessment of life skill development of adolescent girls through Kishori Panchayat: An adolescents for health action model in selected villages of rural Central India", 2019. |   | 1 |
| Guillén-Gámez F.D., Higuera-Rodríguez L., Medina-García M., "Developing a regression model of cooperative learning methodology in pre-service teacher education: A sustainable path for transition to teaching profession", 2020.  |   | 1 |
| Gunasekaran S., "Integrated teaching model: A follow-up with fundamental aerodynamics", 2018.                                                                                                                                      |   | 1 |
| Gutierrez A., Lowe K., Guenther J., "Indigenous student literacy outcomes in Australia: a systematic review of literacy programmes", 2019.                                                                                         |   | 1 |
| Haigh M., "Internationalising the university curriculum: Response to M.G. Jackson", 2003.                                                                                                                                          |   | 1 |

|                                                                                                                                                                                                                                                                                                              |   |   |   |
|--------------------------------------------------------------------------------------------------------------------------------------------------------------------------------------------------------------------------------------------------------------------------------------------------------------|---|---|---|
| Handayani S., Umi Mintarti S., Megasari R., Omar N., "Developing of STEM-based learning models for economic education student for facing Industry revolution 4.0 in East Java", 2020.                                                                                                                        |   | 1 |   |
| Harding G., Taylor K.M.G., "Extemporaneous preparation teaching in UK schools of pharmacy: Anachronism or badge of office?", 2005.                                                                                                                                                                           | 1 |   | 1 |
| Harding K.E., Shields N., Whiteside M., Taylor N.F., ""A Great First Step into Research"": Stepping into research is an effective and sustainable model for research training in clinical settings a report of 6-year outcomes", 2016.                                                                       | 1 |   |   |
| Hart R.A., Espinosa R.A., Iltus S., Lorenzo R., "Children's participation: The theory and practice of involving young citizens in community development and environmental care", 2013.                                                                                                                       |   |   | 1 |
| Hartoyo, Laras D., Soenarto, "Survey on Integration of Expertise Competency Test into Teacher Certification Program of Productive Vocational Teachers", 2018.                                                                                                                                                | 1 |   |   |
| Haselberger D., Motschnig R., "Computer science students' experience of reflecting on team leadership - A case study of a student-centered course on communication", 2019                                                                                                                                    | 1 | 1 | 1 |
| Hasna A.M., "Embedding sustainability in capstone engineering design projects", 2010.                                                                                                                                                                                                                        | 1 |   | 1 |
| Hassanpour B., Atun R.A., Ghaderi ., ""From words to action: Incorporation of sustainability in architectural education", 2017.                                                                                                                                                                              | 1 |   | 1 |
| Heartfield M., Gibson T., "Mentoring for nurses in general practice: national issues and challenges.", 2005.                                                                                                                                                                                                 | 1 | 1 | 1 |
| Hegarty B., Thompson M., "A teacher's influence on student engagement: Using smartphones for creating vocational assessment ePortfolios", 2019.                                                                                                                                                              |   | 1 |   |
| Heinmüller M., Liel K., Angerer P., Gündel H., Geldermann B., Gottwald M., Kimil A., Limm H., "Health coaching as a part of integration into the job market - Evaluation of a qualification concept [Gesundheits-Coaching in der Arbeitsmarktintegration - Evaluation eines Qualifizierungskonzepts]", 2014. |   | 1 |   |
| Henderson A., Twentyman M., Heel A., Lloyd B., "Students' perception of the psycho-social clinical learning environment: An evaluation of placement models", 2006.                                                                                                                                           | 1 |   |   |
| Hind P., Wilson A., Lenssen G., "Developing leaders for sustainable business", 2009.                                                                                                                                                                                                                         | 1 |   |   |
| Holdsworth S., Thomas I., "A sustainability education academic development framework (SEAD)", 2016.                                                                                                                                                                                                          |   |   | 1 |
| Hoover J.J., Soltero-González L., Wang C., Herron S., "Sustaining a Multitiered System of Supports for English Learners in Rural Community Elementary Schools", 2020.                                                                                                                                        | 1 | 1 |   |
| Howley P., Roberts T., "Engaging school students and educators with the practice of statistics", 2020.                                                                                                                                                                                                       |   |   | 1 |
| Husanu I.N.C., Ertekin Y., Chiou R., Mauk M.G., "The contribution of capstone projects in green/renewable energy areas to growth of the engineering curriculum in global sustainable development", 2017.                                                                                                     | 1 |   |   |
| Hytynen P., Keltikangas K., "Tools and inspiration for engineering education development through stakeholder cooperation", 2015.                                                                                                                                                                             |   |   | 1 |
| Idowu P., "Quest for a perfect power engineering program", 2003                                                                                                                                                                                                                                              |   |   | 1 |
| Ieong S.S.L., Lau S.P., "Quality input and sustainability in early immersion classrooms: A case study of an experimental school in Macao", 2011.                                                                                                                                                             |   | 1 | 1 |
| Ilieva N., Boiadjeva E., "Design of an educational technology in engineering ecology", 2017.                                                                                                                                                                                                                 |   |   |   |
| *Iliško D., Ignatjeva S., "The use of information and communication technologies by secondary school teachers for developing a more sustainable pedagogy in latvia", 2015.                                                                                                                                   |   |   |   |
| *Iskakova M.O., "Training future teachers in the context of sustainable development", 2013.                                                                                                                                                                                                                  |   |   |   |
| Ismail A., Hassan R., Abubakar A., Hussin H., Mat Hanafiah M.A., Asary L.H., "The development of tvet educator competencies for quality Educator", 2018.                                                                                                                                                     |   | 1 |   |
| Jaeger M., Adair D., "Two consecutive project-based learning engineering design courses - An analysis of portfolio assessment results", 2014.                                                                                                                                                                |   | 1 |   |
| Jalilah Yusof I., Abdul Latif A., Che Derasid N.A., Md Jani M.D., "Research literacy level of education postgraduate research students using rasch measurement model", 2019.                                                                                                                                 | 1 |   |   |
| Jamieson M.V., Shaw J.M., "Teaching engineering for a changing landscape", 2019.                                                                                                                                                                                                                             | 1 |   |   |



|                                                                                                                                                                                                                                                                                                                                                                                                                                                                                  |   |   |
|----------------------------------------------------------------------------------------------------------------------------------------------------------------------------------------------------------------------------------------------------------------------------------------------------------------------------------------------------------------------------------------------------------------------------------------------------------------------------------|---|---|
| Jayaram S., Engmann M., "Developing skills for employability at the secondary level: Effective models for Asia", 2014.                                                                                                                                                                                                                                                                                                                                                           | 1 |   |
| Jeffery H.E., Kocova M., Tozija F., Gjorgiev D., Pop-Lazarova M., Foster K., Polverino J., Hill D.A., "The impact of evidence-based education on a perinatal capacity-building initiative in Macedonia", 2004.                                                                                                                                                                                                                                                                   | 1 | 1 |
| Jegatheswaran R., Florin I., Hazirah A.L., Shukri M., Latib A.S., "Transforming forest education to meet the changing demands for professionals", 2018.                                                                                                                                                                                                                                                                                                                          |   | 1 |
| *Jegstad K.M., Sinnes A.T., "Chemistry Teaching for the Future: A model for secondary chemistry education for sustainable development", 2015.                                                                                                                                                                                                                                                                                                                                    |   |   |
| Jenkins A., "Entrepreneurial learning for sustainable futures", 2017.                                                                                                                                                                                                                                                                                                                                                                                                            |   | 1 |
| Jens M., Nirja M., Wee Liang T., Hanjun H., John T., "Managing for innovation", 2016.                                                                                                                                                                                                                                                                                                                                                                                            | 1 |   |
| Johan K., Turan F.M., "The development of Sustainability Graduate Community (SGC) as a learning pathway for sustainability education - A framework for engineering programmes in Malaysia Technical Universities Network (MTUN)", 2016.                                                                                                                                                                                                                                          | 1 |   |
| Johnson S., Scholtz Z., Hodges M., Botha T., "An approach to delivering sustainable teacher development in large science classes", 2003.                                                                                                                                                                                                                                                                                                                                         |   | 1 |
| Johnson S., "Reconceptualising gardening to promote inclusive education for sustainable development", 2012.                                                                                                                                                                                                                                                                                                                                                                      | 1 | 1 |
| Johnsson G., Kerslake R., Crook S., "Delivering allied health services to regional and remote participants on the autism spectrum via video-conferencing technology: Lessons learned", 2019.                                                                                                                                                                                                                                                                                     |   | 1 |
| Jons L., "The supportive character of teacher education triadic conferences: detailing the formative feedback conveyed", 2019.                                                                                                                                                                                                                                                                                                                                                   |   | 1 |
| Kabanova N., Kogan M., "Needs analysis as a cornerstone in formation of ICT competence in language teachers through specially tailored in-service training course", 2017.                                                                                                                                                                                                                                                                                                        |   | 1 |
| Kadji-Beltran C., Christodoulou N., Zachariou A., Lindemann-Matthies P., Barker S., Kadis C., "An ESD pathway to quality education in the Cyprus primary education context", 2017.                                                                                                                                                                                                                                                                                               | 1 | 1 |
| Kadji-Beltran C., Zachariou A., Stevenson R.B., "Leading sustainable schools: Exploring the role of primary school principals", 2013.                                                                                                                                                                                                                                                                                                                                            | 1 |   |
| Kamalikhah T., Najarkolaei F.R., Sabzmakan L., Rouhani Tonekaboni N., "Kirkpatrick evaluation of theory-based educational program for low back pain management in teachers", 2017.                                                                                                                                                                                                                                                                                               |   | 1 |
| Kaneene J.B., Thiagarajan D., Chigwa F., Gondwe T., Gunaseelan L., Thirunavukkarasu M., Babu M., Balakrishnan V., Kambewa D., Mvula R., Dzanja J., Bakili O., Mlotha V., Kakwera M., Chmombo M., Mwangela A., Sivaselvam S.N., Miller R., Asokan S.A., Palanidurai R., Prathaban S., Kumanan K., Ramesh Saravanakumar R., Mohan Kumar P.S., "A tri-lateral capacity building approach to strengthen the dairy value chain in Malawi: Overview of the design and implementation". |   | 1 |
| Karetsos S., Haralambopoulos D., "Integration of competencies in an ontology-based framework supporting teachers to construct learning designs in the domain of sustainable energy education", 2011.                                                                                                                                                                                                                                                                             | 1 |   |
| Kastl P., Romeike R., "Agile projects to foster cooperative learning in heterogeneous classes", 2018.                                                                                                                                                                                                                                                                                                                                                                            | 1 | 1 |
| Kearney S., "Self and peer assessment as a means of enhancing the student learning experience: A unique and practical model", 2016.                                                                                                                                                                                                                                                                                                                                              |   | 1 |
| Kerski J.J., "The role of GIS in digital earth education", 2008.                                                                                                                                                                                                                                                                                                                                                                                                                 |   |   |
| Kertesz J., Downing J., "Piloting teacher education practicum partnerships: Teaching alliances for professional practice (TAPP-Tas) 1", 2016.                                                                                                                                                                                                                                                                                                                                    |   | 1 |
| Khare A., Hurst D., "On the line: Business education in the digital age", 2017.                                                                                                                                                                                                                                                                                                                                                                                                  | 1 |   |
| Khaustov A., Redina M., Aleinikova A., Mamadzhannov R., "Green campus of the green university: The RUDN-University experience", 2017.                                                                                                                                                                                                                                                                                                                                            |   | 1 |
| Kibar P.N., Akkoyunlu B., "Searching for visual literacy: Secondary school students are creating infographics", 2015.                                                                                                                                                                                                                                                                                                                                                            |   | 1 |
| Kibuka-Sebitosi E., "Towards a model for international collaboration and partnerships in teacher education in Africa: Education for sustainable development in South Africa", 2015.                                                                                                                                                                                                                                                                                              |   | 1 |

|                                                                                                                                                                                                                                                                                                         |   |   |   |
|---------------------------------------------------------------------------------------------------------------------------------------------------------------------------------------------------------------------------------------------------------------------------------------------------------|---|---|---|
| Klochko O., Fedorets V., Maliar O., Hnatuyk V., "The use of digital models of hemodynamics for the development of the 21st century skills as a components of healthcare competence of the physical education teacher",2020                                                                              |   |   | 1 |
| Korkmaz O., "Effective pedagogies for online mathematics courses: A review of literature",2011.                                                                                                                                                                                                         |   |   | 1 |
| Kubeyev Y.K., Shkutina L.A., Karstina S.G., "Development of management education in Kazakhstan at the present stage",2017.                                                                                                                                                                              | 1 | 1 | 1 |
| Kumar A.S., Swaroop P., Roy A., Kumar P., Kumar M., Swaroop S., Gupta P.K., "Challenges and models in conducting space technology courses with multi-ethnic students group – Assessment of International courses at IIRS & CSSTEAP",2017.                                                               |   |   | 1 |
| Labate H., "Science education: A (pending) chapter in the curriculum transformation in Argentina",2007.                                                                                                                                                                                                 |   | 1 | 1 |
| Lakin L., Littledyke M., "Health promoting schools: Integrated practices to develop critical thinking and healthy lifestyles through farming, growing and healthy eating",2008.                                                                                                                         |   |   | 1 |
| Lang Q.C., "Developing an asynchronous computer mediated communication tool for projectbased learning",2010.                                                                                                                                                                                            |   | 1 |   |
| Lans T., Blok V., Wesselink R., "Learning apart and together: Towards an integrated competence framework for sustainable entrepreneurship in higher education",2014.                                                                                                                                    | 1 |   |   |
| Lanska D., Cech P., Chromy J., "Selected determinants of educational communication in a multicultural society",2017.                                                                                                                                                                                    |   | 1 |   |
| Lappalainen P., "Integrating social competence into engineering curriculum",2010.                                                                                                                                                                                                                       |   | 1 |   |
| Larson P.R., Chege P., Dahlman B., Gibson C., Evensen A., del Colon-Gonzalez M.C., Onguka S., Lamptey R., Cayley W.E., Nguyen B.-M., Johnson B., Getnet S., "Future of family medicine faculty development in sub-saharan Africa",2017.                                                                 |   | 1 |   |
| Lee A.G., Chen Y., "Structured curricula and curriculum development in ophthalmology residency",2014.                                                                                                                                                                                                   | 1 | 1 |   |
| Lieblein G., Østergaard E., Francis C., "Becoming an agroecologist through action education",2004.                                                                                                                                                                                                      | 1 |   |   |
| Little M.A., Milliken P.J., "Practicing what we preach: Balancing teaching and clinical practice competencies",2007.                                                                                                                                                                                    |   | 1 |   |
| Liu S., "Fuzzy evaluation method of teachers' informationized teaching ability",2020.                                                                                                                                                                                                                   |   | 1 |   |
| Lönngren J., Svanström M., Ingerman Å., Holmberg J., "Dealing with the multidimensionality of sustainability through the use of multiple perspectives – a theoretical framework",2016.                                                                                                                  | 1 |   | 1 |
| Lorenzo Rial M.A., Álvarez Lires M.M., Correa A.A., Rodríguez U.P., "Learning how to interpret ocean acidification with on-line resources in a contextualised experimentation scenario [Aprender a interpretar la acidificación oceánica con recursos on-line y experimentación contextualizada]",2019. | 1 |   | 1 |
| Loubser C., Noor Azlin Y., Dreyer J., Nik Azzyati A.K., "The effectiveness of environmental education workshops for teachers, learners and schools in Malaysia",2014.                                                                                                                                   |   |   | 1 |
| Lovett G., Lambert C., Chu E., Gupta J., "The Grounding for a Fossil Fuel Free World: Integrating Climate Change Education into Secondary Schools",2018.                                                                                                                                                | 1 |   | 1 |
| Lowther J., Sellick J., "Embedding sustainability literacy in the legal curriculum: Reflections on the Plymouth model",2016.                                                                                                                                                                            |   |   | 1 |
| Lozano R., Merrill M.Y., Sammalisto K., Ceulemans K., Lozano F.J., "Connecting competences and pedagogical approaches for sustainable development in higher education: A literature review and framework proposal",2017.                                                                                | 1 |   |   |
| Luccarelli M., Tillman S., Lay R., Grundmeier A.-M., Högsdal S., "Sustainable design education for elementary schools: Interdisciplinary development of new educational models through design thinking",2019.                                                                                           |   |   | 1 |
| Luster-Teasley S., Waters C., "Reforming Environmental Engineering laboratories for sustainable engineering: Incorporating problem based learning and case studies into an Environmental Engineering lab course",2011.                                                                                  |   | 1 |   |
| Mackenzie Glander-Dolo S., "Première université régionale du mali-education distance (Prem-U): Challenges and insights for ubiquitous education",2011.                                                                                                                                                  |   | 1 |   |
| Mackey J., Davis N., Dabner N., "Relevant, current and sustainable digital strategies to prepare future teachers to lead e-learning",2012.                                                                                                                                                              |   | 1 |   |
| MacLennan D., "Human agency and learning: A computer-based exploration of sustainable water management",2015.                                                                                                                                                                                           | 1 |   |   |

|                                                                                                                                                                                                                                                                                                |   |   |
|------------------------------------------------------------------------------------------------------------------------------------------------------------------------------------------------------------------------------------------------------------------------------------------------|---|---|
| Magalhães A.C., Shigaki H.B., Lopes D.P.T., "The historical-critical pedagogy in business administration", 2015.                                                                                                                                                                               | 1 |   |
| Mahaffy P.G., Holme T.A., Martin-Visscher L., Martin B.E., Versprille A., Kirchhoff M., McKenzie L., Towns M., "Beyond ""inert"" Ideas to Teaching General Chemistry from Rich Contexts: Visualizing the Chemistry of Climate Change (VC3)", 2017.                                             |   | 1 |
| Mahmood S., Palaniappan S., Hasan R., Sarker K.U., Abass A., Rajegowda P.M., "Raspberry PI and role of IoT in Education", 2019.                                                                                                                                                                | 1 | 1 |
| Maiorana F., Berry M., Nelson M., Lucarelli C., Phillips M., Mishra S., Benassi A., "International perspectives on CS teacher formation and professional development", 2017.                                                                                                                   |   | 1 |
| Malott M., "Nunavut: building nursing capacity.", 2012.                                                                                                                                                                                                                                        |   | 1 |
| Manabe Y.C., Katabira E., Brough R.L., Coutinho A.G., Sewankambo N., Merry C., "Developing independent investigators for clinical research relevant for Africa", 2011.                                                                                                                         |   | 1 |
| Martin K., Summers D., Sjerps-Jones H., "Sustainability and teacher education", 2007.                                                                                                                                                                                                          |   | 1 |
| Martina C.A., Mutrie A., Ward D., Lewis V., "A sustainable course in research mentoring", 2014.                                                                                                                                                                                                |   | 1 |
| Martínez M.F.C., Mendoza Velazco D.J., Cejasc M.N., Villacis J.L.R., Freire Y.M.O., "A Performance-Centred Competency-Based Approach to Quality University Teaching", 2019.                                                                                                                    |   | 1 |
| Martusewicz R.A., Edmundson J., Lupinacci J., "EcoJustice education: Toward diverse, democratic, and sustainable communities", 2011.                                                                                                                                                           |   | 1 |
| Martusewicz R.A., "Toward an anti-centric ecological culture bringing a critical eco-feminist analysis to ecojustice education", 2013.                                                                                                                                                         | 1 | 1 |
| Maruna M., Milovanovic Rodic D., Colic R., "Remodelling urban planning education for sustainable development: the case of Serbia", 2018.                                                                                                                                                       |   | 1 |
| Massa N., Dischino M., Donnelly J.F., Hanes F.D., DeLaura J.A., "Problem-based learning in a pre-service technology and engineering education course", 2012.                                                                                                                                   |   | 1 |
| Mattick C.S., Allenby B.R., "Teaching old disciplines new tricks: Sustainable engineering education", 2013.                                                                                                                                                                                    | 1 |   |
| Mavlyudova L.U., Shamsuvalyeva E.S., "Introduction of the ideas of sustainable development into ecological education", 2015.                                                                                                                                                                   | 1 |   |
| McCarthy D., Seery N., Gordon S., "Challenges facing continuous professional development for technology education in Irish second level education", 2010.                                                                                                                                      |   | 1 |
| *McMillen J.D., Swick S.D., Frazier L.M., Bishop M., Goodell L.S., "Teachers' perceptions of sustainable integration of garden education into Head Start classrooms: A grounded theory approach", 2019.                                                                                        |   |   |
| Melin Emilsson U., Lilje B., "Training social competence in engineering education: Necessary, possible or not even desirable? An explorative study from a surveying education programme", 2008.                                                                                                |   | 1 |
| Membrillo-Hernández J., de J. Ramírez-Cadena M., Caballero-Valdés C., Ganem-Corvera R., Bustamante-Bello R., Benjamín-Ordoñez J.A., Elizalde-Siller H., "Challenge Based Learning: The Case of Sustainable Development Engineering at the Tecnológico de Monterrey, Mexico City Campus", 2018. | 1 |   |
| Menezes M.S., Gusmão M.M., De Araújo Santana R.N., Aguiar C.V.N., Mendonça D.R., Barros R.A., Silva M.G., Lins-Kusterer L., "Translation, transcultural adaptation, and validation of the role-modeling cost-conscious behaviors scale", 2019.                                                 |   | 1 |
| Mercer S., MacIntyre P., Gregersen T., Talbot K., "Positive language education: Combining positive education and language education", 2018.                                                                                                                                                    | 1 | 1 |
| Mifsud M.C., "Student Perceptions on the First Masters in Education for Sustainable Development in Malta", 2017.                                                                                                                                                                               | 1 |   |
| Miller M.E., Utley R., Lukes E., "Private settings for community health nursing", 2013.                                                                                                                                                                                                        | 1 | 1 |
| Miñano R., Aller C.F., Anguera Á., Portillo E., "Introducing ethical, social and environmental issues in ICT engineering degrees", 2015.                                                                                                                                                       | 1 | 1 |
| Mistree F., Panchal J.H., Kashinathwaychal P., "Educating engineering educators to nurture 21st century indian engineers", 2014.                                                                                                                                                               | 1 |   |
| Miyake N., "Knowledge constructive jigsaw as an adaptive learning framework: Its design principles and network supports", 2011.                                                                                                                                                                |   | 1 |
| Modebelu M.N., "Curriculum development models for quality educational system", 2015.                                                                                                                                                                                                           | 1 | 1 |

|                                                                                                                                                                                                                                                    |   |   |   |
|----------------------------------------------------------------------------------------------------------------------------------------------------------------------------------------------------------------------------------------------------|---|---|---|
| Modebelu M.N., "Curriculum development models for quality educational system", 2016.                                                                                                                                                               | 1 |   | 1 |
| Mohammed J., Amer S.T., "Intellectual development for sustainability in design and manufacturing", 2016.                                                                                                                                           | 1 |   | 1 |
| Mohammed J., "Introducing manufacturing engineering with kentucky governors scholar program", 2013.                                                                                                                                                | 1 |   |   |
| Monroe M.C., Andrews E., Biedenweg K., "A framework for environmental education strategies", 2007.                                                                                                                                                 |   |   | 1 |
| Motschnig R., Pfeiffer D., Gawin A., Gawin P., Steiner M., "When kids are challenged to solve real problems - Case study on transforming learning with interpersonal presence and digital technologies", 2017.                                     | 1 |   |   |
| Mróz A., Ocetkiewicz I., Tomaszewska B., "What should be included in education programmes – The socio-education analysis for sustainable management of natural resources", 2020.                                                                   |   |   | 1 |
| Muhammad Raza Abidi S., Hussain M., Ge S., Ding H., Zhu W., Zhang W., "Massive Learning Behaviours Influence Educational Sustainability: A Machine Learning Approach", 2020.                                                                       | 1 |   | 1 |
| Mukaddes M., Agnello M.F., "Sustainability/GREEN: Challenges and changes for educators and the engineering curriculum", 2009.                                                                                                                      | 1 |   | 1 |
| Mulà I., Tilbury D., Ryan A., Mader M., Dlouhá J., Mader C., Benayas J., Dlouhý J., Alba D., "Catalysing Change in Higher Education for Sustainable Development: A review of professional development initiatives for university educators", 2017. |   |   | 1 |
| Narula A., Kalra M.B., "Recent trends in happiness research", 2019.                                                                                                                                                                                | 1 | 1 | 1 |
| Ndlovu M., Wessels D., de Villiers M., "Competencies in using sketchpad in geometry teaching and learning: Experiences of preservice teachers", 2013.                                                                                              |   | 1 | 1 |
| Nehring J.H., O'Brien E.J., "Strong agents and weak systems: University support for school level improvement", 2012.                                                                                                                               |   | 1 |   |
| Ngeze L.V., "Developing a model for effective cascaded school teacher training on ICT integration in Tanzania", 2019.                                                                                                                              |   | 1 |   |
| Nguyen-Truong C.K.Y., Tang J., Hsiao C.-Y., "Community interactive research workshop series: Community members engaged as team teachers to conduct research", 2017.                                                                                |   | 1 | 1 |
| Niklasson C., Christie M., Larsson S., Öhrström L., Bowden J., "How to prepare master students in chemical and bioengineering for the unknown future", 2004.                                                                                       |   | 1 |   |
| *Nilkham T., Pinyoanantapong B., Wongchantra P., "A study and promotion of attributes of environmental educators for bachelor's degree students", 2011.                                                                                            |   |   |   |
| Noppakroh N., Singseewo A., Wongchantra P., Chookhampaeng C., "A study operations environmental education in schools: The northeast of Thailand", 2012.                                                                                            |   |   | 1 |
| Numgaudienė A., Žygaitienė B., "Content analysis of technology teacher training programmes of some European countries [Europos šalių technologijų mokytojų rengimo programų turinio analizė]", 2014.                                               |   | 1 |   |
| Nurmalasari D., Swaramarinda D.R., "Can TEFA (teaching factory) be realized with a creative economy, appropriate learning model and ICT in Indonesia?", 2018.                                                                                      |   | 1 |   |
| Nyoni C.N., Botma Y., "Implementing a competency-based midwifery programme in Lesotho: A gap analysis", 2019.                                                                                                                                      |   | 1 |   |
| O'Donoghue T., Clarke S., "Faith-based non-government organizations and education in 'post-new war societies': Background, directions and challenges in leadership, teaching and learning", 2014.                                                  |   | 1 |   |
| Ofei-Manu P., Shimano S., "Sustainable organizations: Evaluating the environmental sustainability of schools and companies in a regional centre of expertise", 2012.                                                                               |   |   | 1 |
| Okada A., Sherborne T., "Equipping the next generation for responsible research and innovation with open educational resources, open courses, open communities and open schooling: An impact case study in Brazil", 2018.                          |   |   | 1 |
| Ontong K., Grange L.L., "The reconceptualisation of sustainability after the decade of education for sustainable development [Die herkonseptualisering van volhoubaarheid ná die dekade van opvoeding vir volhoubare ontwikkeling]", 2015          |   |   | 1 |
| *Ortega M.R.M., Rangel J.A.M., Chacín Í.M.P., Ortega J.I.M., "Teacher Training Model in Consumer Education: A Proposal for Ecuadorian Primary Education", 2020.                                                                                    |   |   |   |
| O'Rafferty S., Curtis H., O'Connor F., "Mainstreaming sustainability in design education - a capacity building framework", 2014.                                                                                                                   | 1 |   |   |

|                                                                                                                                                                                                                                                                                                                                                                                                         |   |   |   |
|---------------------------------------------------------------------------------------------------------------------------------------------------------------------------------------------------------------------------------------------------------------------------------------------------------------------------------------------------------------------------------------------------------|---|---|---|
| O'Sullivan L., Seabra N.M., "School in a box in low resource primary school in Mozambique: Practical application of zone of proximal development in teacher training with mobile technology",2016.                                                                                                                                                                                                      |   |   | 1 |
| *Owen S.M., "Improving Kiribati educational outcomes: Capacity-building of school leaders and teachers using sustainable approaches and donor support",2019.                                                                                                                                                                                                                                            |   |   |   |
| Owens T.L., "Higher education in the sustainable development goals framework",2017,                                                                                                                                                                                                                                                                                                                     |   |   | 1 |
| Owston R., "Contextual factors that sustain innovative pedagogical practice using technology: An international study",2007.                                                                                                                                                                                                                                                                             |   |   | 1 |
| Ozbek M.E., Clevenger C.M., "Teaching sustainability competencies to high school students using small-scale community-based construction projects",2014.                                                                                                                                                                                                                                                | 1 |   |   |
| Paredes-Chi A.A., Viga-de Alva M.D., "Environmental education (EE) policy and content of the contemporary (2009–2017) Mexican national curriculum for primary schools",2018.                                                                                                                                                                                                                            |   |   | 1 |
| Paretti M.C., Richter D.M., McNair L.D., "Sustaining interdisciplinary projects in green engineering: Teaching to support distributed work",2010.                                                                                                                                                                                                                                                       |   |   |   |
| Pasichnyk N., Rizhniak R., Krasnoshchok I., Botuzova Y., Akbash K., "Construction of theoretical model for sustainable development in future mathematical teachers of higher education",2020.                                                                                                                                                                                                           |   |   |   |
| Peacock A., Rawson B., "Helping teachers to develop competence criteria for evaluating their professional development",2001.                                                                                                                                                                                                                                                                            |   |   | 1 |
| Pearce P.L., Zare S., "The orchestra model as the basis for teaching tourism experience design",2017.                                                                                                                                                                                                                                                                                                   | 1 |   | 1 |
| Pearson D., Walpole S., Barna S., "Challenges to professionalism: Social accountability and global environmental change",2015.                                                                                                                                                                                                                                                                          |   |   | 1 |
| Pedro N., Matos J.F., Pedro A., "Digital technologies, teachers' competences, students' engagement and future classroom: ITEC project",2014.                                                                                                                                                                                                                                                            |   |   | 1 |
| Pennington R., Yeung A.S., Dillon A., Noble T., "Positive education: Theory, practice, and challenges",2018.                                                                                                                                                                                                                                                                                            |   |   | 1 |
| Pérez-Gómez R., Aragón-Velasco A., Manrique-Sancho M.T., "Mapping and analyzing education systems performance in Spain with cartographic techniques",2015.                                                                                                                                                                                                                                              | 1 |   |   |
| Perry S.J., "Towards a framework for learning and teaching in engineering in the 21 st century",2006.                                                                                                                                                                                                                                                                                                   |   |   | 1 |
| Peterson R., Herrington J., Konza D., Tzvetkova-Arsova M., Stefanov K., "Assisting Bulgarian special educators with competency development online",2008.                                                                                                                                                                                                                                                | 1 | 1 | 1 |
| Phillips J.M., Riner M.E., "Global health engagement: At home and abroad",2018.                                                                                                                                                                                                                                                                                                                         |   |   | 1 |
| Polleck J., Wirtz J., "Building Urban Pre-Service Teachers' Pedagogical Knowledge and Skills through Digital Poetry Collaborations",2013.                                                                                                                                                                                                                                                               |   |   | 1 |
| Poncelet A.N., Mazotti L.A., Blumberg B., Wamsley M.A., Grennan T., Shore W.B., "Creating a longitudinal integrated clerkship with mutual benefits for an academic medical center and a community health system",2014.                                                                                                                                                                                  |   |   | 1 |
| Poppe M., Böck K., Zitek A., Scheikl S., Loach A., Muhar S., "What? How? Why? Students explore river landscapes – promoting a systems-based understanding as the cornerstone of “lived” participation in river management [Was? Wie? Warum? Jugendliche erforschen Flusslandschaften – Förderung des Systemverständnisses als Basis für gelebte Partizipation im Flussgebietsmanagement]",2016.         | 1 |   |   |
| Pruskil S., Deis N., Druener S., Kiessling C., Philipp S., Rockenbach K., "Implementation of “social and communicative competencies” in medical education. The importance of curriculum, organisational and human resource development [Implementierung von “kommunikativen und sozialen Kompetenzen” im Medizinstudium. Zur Bedeutung von Curriculums-, Organisations- und Personalentwicklung]",2015. |   |   | 1 |
| Quadrado J.C., Zaitseva K.K., "New pedagogical approaches to induce sustainable development Goals",2019.                                                                                                                                                                                                                                                                                                | 1 |   | 1 |
| Quail M., Brundage S.B., Spitalnick J., Allen P.J., Beilby A.J., "Student self-reported communication skills, knowledge and confidence across standardised patient, virtual and traditional clinical learning environments",2016.                                                                                                                                                                       |   |   | 1 |
| Quinn E.M., "Computing cultural and linguistic survival: A case study of student filmmaking in the digital age",2012.                                                                                                                                                                                                                                                                                   |   |   | 1 |
| Rabl M., Hillmer G., "The cultivation of engineering talent",2012.                                                                                                                                                                                                                                                                                                                                      |   |   | 1 |

|                                                                                                                                                                                                                                                                                                                                                                                                                                |   |   |   |
|--------------------------------------------------------------------------------------------------------------------------------------------------------------------------------------------------------------------------------------------------------------------------------------------------------------------------------------------------------------------------------------------------------------------------------|---|---|---|
| Rajab A., Wright N., "The idea of autonomy and its interplay with culture in child-centered education: evidence from practitioners in preschools in Saudi Arabia", 2018.                                                                                                                                                                                                                                                       | 1 |   | 1 |
| Rajan P., "Not engineering to help but learning to (un)learn: Integrating research and teaching on epistemologies of technology design at the margins", 2015.                                                                                                                                                                                                                                                                  |   |   | 1 |
| Ramirez B., West D.J., Costell M.M., "Development of a culture of sustainability in health care organizations", 2013.                                                                                                                                                                                                                                                                                                          | 1 |   |   |
| Ramli S., Rasul M.S., Affandi H.M., "The importance of green skills-from the perspective of TVET lecturers and teacher trainees", 2019.                                                                                                                                                                                                                                                                                        |   |   | 1 |
| Randall L., Turner S., McLafferty L., "A colourful dot on a dreary economic canvas: Building capacity for innovation in schools through the Coach Consult Programme", 2015.                                                                                                                                                                                                                                                    |   | 1 |   |
| Randon G., Bortolami E., Grosso S., "Back to units for nursing students' education? The Dedicated Education Units (DEU) [Un ritorno ai "reparti scuola"? Le unità dedicate alla formazione (DEU)]", 2017.                                                                                                                                                                                                                      |   | 1 |   |
| Ranieri M., Bruni I., "Digital and media literacy in teacher education: Preparing undergraduate teachers through an academic program on digital storytelling", 2018.                                                                                                                                                                                                                                                           |   | 1 |   |
| Ranieri M., Bruni I., "Promoting digital and media competences of pre-and in-service teachers. Research findings of a project from six european countries", 2018.                                                                                                                                                                                                                                                              |   | 1 |   |
| Raselimo M., Wilmot D., "Geography teachers' interpretation of a curriculum reform initiative: The case of the Lesotho Environmental Education Support Project (LEESP)", 2013.                                                                                                                                                                                                                                                 |   |   | 1 |
| Räthzel N., Uzzell D., "Transformative environmental education: a collective rehearsal for reality", 2009.                                                                                                                                                                                                                                                                                                                     | 1 |   |   |
| Rayon Jerez A., Guenaga M., Núñez A., "A web platform for the assessment of competences in Mobile Learning Contexts", 2014.                                                                                                                                                                                                                                                                                                    |   | 1 |   |
| Razzouk R., Razdan A., Adhikari A.P., "The impact of educators' training in photovoltaic solar energy in developing countries", 2015.                                                                                                                                                                                                                                                                                          |   |   | 1 |
| Riera D., "The great outdoors: An ArcGIS approach integrating geographic knowledge and environmental education in Florida", 2016.                                                                                                                                                                                                                                                                                              | 1 |   | 1 |
| Rodríguez-Aboytes J.G., Nieto-Caraveo L.M., "Assessment of Competencies for Sustainability in Secondary Education in Mexico", 2018.                                                                                                                                                                                                                                                                                            | 1 |   |   |
| Roe E.A., Whyte-Marshall M., "Mentoring for evidence-based practice: A collaborative approach", 2012.                                                                                                                                                                                                                                                                                                                          |   | 1 |   |
| Rohweder L., Virtanen A., "Developing the model on the learning for sustainable development in higher education", 2009.                                                                                                                                                                                                                                                                                                        | 1 |   |   |
| Ruge D., Nielsen M.K., Mikkelsen B.E., Bruun-Jensen B., "Examining participation in relation to students' development of health-related action competence in a school food setting: LOMA case study", 2016.                                                                                                                                                                                                                    | 1 |   |   |
| Sahlberg P., Oldroyd D., "Pedagogy for economic competitiveness and sustainable development", 2010.                                                                                                                                                                                                                                                                                                                            |   |   | 1 |
| Salite I., "Educational action research for sustainability: Constructing a vision for the future in teacher education", 2008.                                                                                                                                                                                                                                                                                                  |   |   | 1 |
| Salvador J.T., Alqahtani F.M., Sauce B.R.J., Alvarez M.O.C., Rosario A.B., Reyes L.D., Mohamed E.R., Awadh L.A., Sanchez K.K.B., Alzaid M., Agman D.D., Schonewille M.A.P., "Development of Student Survey on Writing Nursing Care Plan: An exploratory sequential mixed-methods study", 2020.                                                                                                                                 | 1 | 1 |   |
| Scherr R.E., Linnell J.D., Smith M.H., Briggs M., Bergman J., Brian K.M., Dharmar M., Feenstra G., Hillhouse C., Keen C.L., Nguyen L.M., Nicholson Y., Ontai L., Schaefer S.E., Spezzano T., Steinberg F.M., Sutter C., Wright J.E., Young H.M., Zidenberg-Cherr S., "The Shaping Healthy Choices Program: Design and Implementation Methodologies for a Multicomponent, School-Based Nutrition Education Intervention", 2014. |   | 1 |   |
| Schildkamp K., Poortman C., "Factors influencing the functioning of data teams", 2015.                                                                                                                                                                                                                                                                                                                                         | 1 | 1 | 1 |
| Schneckenberg D., "Ecompetence to move faculty towards a sustainable use of learning technologies in higher education", 2011.                                                                                                                                                                                                                                                                                                  | 1 | 1 | 1 |
| Schofield R., Chircop A., Baker C., Dietrich Leurer M., Duncan S., Wotton D., "Entry-to-practice public health nursing competencies: A Delphi method and knowledge translation strategy", 2018.                                                                                                                                                                                                                                | 1 | 1 |   |

|                                                                                                                                                                                                                                                                                                      |   |   |
|------------------------------------------------------------------------------------------------------------------------------------------------------------------------------------------------------------------------------------------------------------------------------------------------------|---|---|
| Schröder T., "A regional approach for the development of TVET systems in the light of the 4th industrial revolution: the regional association of vocational and technical education in Asia", 2019.                                                                                                  |   | 1 |
| Schuler S., Fanta D., Rosenkraenzer F., Riess W., "Systems thinking within the scope of education for sustainable development (ESD)–a heuristic competence model as a basis for (science) teacher education", 2018.                                                                                  |   | 1 |
| Serow P., "Education for sustainability in primary mathematics education", 2015.                                                                                                                                                                                                                     |   | 1 |
| Shallcross T., Robinson J., "Is a decade of teacher education for sustainable development essential for survival?", 2007.                                                                                                                                                                            |   | 1 |
| Sheegog J.F., Graham K., "Action based leadership-intensive development of senior technical leaders & enterprise teams", 2015.                                                                                                                                                                       | 1 | 1 |
| Sheffield R.S., McIlvenny L., "Design and implementation of scientific inquiry using technology in a teacher education program", 2014.                                                                                                                                                               | 1 |   |
| Shephard K., "Higher education for sustainability: Seeking affective learning outcomes", 2008.                                                                                                                                                                                                       |   | 1 |
| Sherman C.W., Steiner S.C., "Implementing Sustainable Evidence-Based Interventions in the Community: A Fidelity-Focused Training Framework for the Savvy Caregiver Program", 2018.                                                                                                                   | 1 |   |
| Shoirah H., Ntranos A., Brandstadter R., Liu Y., Medina E., Kwan J., Krieger S., "Education research: Resident education through adult learning in neurology: Implementation and impact", 2018.                                                                                                      | 1 |   |
| Sidebotham M., Fenwick J., "Midwifery students' experiences of working within a midwifery caseload model", 2019.                                                                                                                                                                                     | 1 |   |
| Sinakou E., Donche V., Pauw J.B., Van Petegem P., "Designing powerful learning environments in education for sustainable development: A conceptual framework", 2019.                                                                                                                                 |   | 1 |
| Sinclair P.M., Levett-Jones T., Morris A., Carter B., Bennett P.N., Kable A., "High engagement, high quality: A guiding framework for developing empirically informed asynchronous e-learning programs for health professional educators", 2017.                                                     |   | 1 |
| Singer-Brodowski M., Grossmann K., Bartke S., Huning S., Weinsziehr T., Hagemann N., "Competency-oriented education for sustainable development: Lessons from five courses on energy poverty", 2018.                                                                                                 | 1 |   |
| Skinner E.A., Chi U., "Intrinsic motivation and engagement as ""active ingredients"" in garden-based education: Examining models and measures derived from self-determination theory", 2012.                                                                                                         | 1 |   |
| Slater J., Falkenberg T., Rutherford J., Colatruglio S., "Food literacy competencies: A conceptual framework for youth transitioning to adulthood", 2018.                                                                                                                                            | 1 | 1 |
| Smith L.H., Petosa R.L., Shoben A., "Peer mentor versus teacher delivery of a physical activity program on the effects of BMI and daily activity: Protocol of a school-based group randomized controlled trial in Appalachia", 2018.                                                                 | 1 |   |
| Smorti S., Peters-Algie M., Rau C., "Engaging student teachers in sustainable praxis in Aotearoa/New Zealand", 2013.                                                                                                                                                                                 |   | 1 |
| Solís-Espallargas C., Ruiz-Morales J., Limón-Domínguez D., Valderrama-Hernández R., "Sustainability in the university: A study of its presence in curricula, teachers and students of education", 2019.                                                                                              |   | 1 |
| Sowmya G., Divya Jyothi G., Shirisha N., Navya K., "Active learning strategies in engineering education", 2018.                                                                                                                                                                                      |   | 1 |
| Srisaeng P., Upvall M.J., "Looking toward 2030: Strengthening midwifery education through regional partnerships", 2019.                                                                                                                                                                              | 1 |   |
| Steyn G.M., "The practice of Mathematics teacher collaboration as grounded in the learning community framework and the invitational education approach [Die praktyk van Wiskunde-onderwysersamewerking soos gefundeer in die leergemeenskapsraamwerk en die uitnodigende onderwysbenadering]", 2015. | 1 |   |
| Stir J., "Restructuring teacher education for sustainability: student involvement through a ""strengths model", 2006.                                                                                                                                                                                |   | 1 |
| Støre-Valen M., Buser M., "Implementing sustainable facility management: Challenges and barriers encountered by Scandinavian FM practitioners", 2019.                                                                                                                                                |   | 1 |
| Strode A., "Students' independent professional activity in pedagogical practice", 2010.                                                                                                                                                                                                              | 1 | 1 |

|                                                                                                                                                                                                                                                                                                                                                                 |   |   |   |
|-----------------------------------------------------------------------------------------------------------------------------------------------------------------------------------------------------------------------------------------------------------------------------------------------------------------------------------------------------------------|---|---|---|
| Sugiyanta L., Sukardjo M., "Adjusted Framework of M-Learning in Blended Learning System for Mathematics Study Field of Junior High School Level VII", 2018.                                                                                                                                                                                                     | 1 | 1 | 1 |
| Suh H., Han S., "Promoting sustainability in university classrooms using a STEM project with mathematical modeling", 2019.                                                                                                                                                                                                                                      |   |   | 1 |
| Suhairom N., Musta'amal A.H., Mohd Amin N.F., Kamin Y., Abdul Wahid N.H., "Quality culinary workforce competencies for sustainable career development among culinary professionals", 2019.                                                                                                                                                                      | 1 | 1 |   |
| Suhrheinrich J., "A sustainable model for training teachers to use pivotal response training", 2015.                                                                                                                                                                                                                                                            |   | 1 |   |
| Sukirman, Utanto Y., Maretta Y.A., "LPTK contribution in development of sustainable teachers professionalism in semarang district", 2018.                                                                                                                                                                                                                       |   | 1 |   |
| Sumaryanta, Mardapi D., Sugiman, Herawan T., "Assessing Teacher Competence and Its Follow-up to Support Professional Development Sustainability", 2018.                                                                                                                                                                                                         |   | 1 |   |
| Sumaryanta, Mardapi D., Sugiman, Herawan T., "Community-based teacher training: Transformation of sustainable teacher empowerment strategy in Indonesia", 2019.                                                                                                                                                                                                 |   | 1 |   |
| Sunell S., Wright A.E., Udahl B.K., Benbow P., "Essential elements for the reintroduction of dental therapy abilities in Canada", 2017.                                                                                                                                                                                                                         |   | 1 |   |
| Susanty R., Yunos Z., Ahmad M., Razali N., "Instilling digital citizenship skills through education: A malaysian perspective", 2019.                                                                                                                                                                                                                            | 1 | 1 | 1 |
| Švab I., Allen J., Žebiene E., Petek Šter M., Windak A., "Training experts in family medicine teaching", 2016.                                                                                                                                                                                                                                                  |   | 1 |   |
| Swain J.D., Pugliese D.N., Mucumbitsi J., Rusingiza E.K., Ruhamyia N., Kagame A., Ganza G., Come P.C., Breakey S., Greenwood B., Muehlschlegel J.D., Patton-Bolman C., Binagwaho A., Morton Bolman R., "Partnership for sustainability in cardiac surgery to address critical rheumatic heart disease in sub-Saharan Africa: The experience from Rwanda", 2014. |   | 1 |   |
| Taboada H.A., Espiritu J.F., Gurrola E., "Catalyzing and Supporting Minority Talent Development in STEM fields: A structured mentoring model to inspire young engineering minds", 2011.                                                                                                                                                                         |   |   | 1 |
| Taib M.T.M., Mustapha R., Yasin A.A., "Innovation in the assessment of technical subjects in Malaysian secondary schools", 2020.                                                                                                                                                                                                                                |   |   | 1 |
| Tang X., Mendieta E., Litzinger T.A., "Building a community of ethics educators in graduate engineering programs: Developing an ethics workshop following a user-oriented approach", 2017.                                                                                                                                                                      |   | 1 |   |
| Taub A., Gilmore G.D., Olsen L.K., "Workforce development: Using role delineation research findings for policy-making and professional practice", 2011.                                                                                                                                                                                                         |   | 1 |   |
| Tedre M., Bangu N., Ngumbuke F.D., Sutinen E., "Implementing a contextualized it curriculum: Ambitions and ambiguities", 2008.                                                                                                                                                                                                                                  | 1 | 1 | 1 |
| Teixeira S., Krings A., "Sustainable Social Work: An Environmental Justice Framework for Social Work Education", 2015.                                                                                                                                                                                                                                          |   |   | 1 |
| Thomson J.S., Anderson K.J., Mara P.R., Stevenson A.D., "Supervision--growing and building a sustainable general practice supervisor system.", 2011.                                                                                                                                                                                                            |   | 1 |   |
| Thor D., Karlsudd P., "Teaching and fostering an active environmental awareness design, validation and planning for action-oriented environmental education", 2020.                                                                                                                                                                                             |   |   | 1 |
| Thürer M., Tomašević I., Stevenson M., Qu T., Huisinigh D., "A systematic review of the literature on integrating sustainability into engineering curricula", 2018                                                                                                                                                                                              | 1 |   | 1 |
| Tondeur J., Van Braak J., Valcke M., "Curricula and the use of ICT in education: Two worlds apart?", 2007.                                                                                                                                                                                                                                                      |   | 1 |   |
| Topps D., Ellaway R.H., Topps M., "Using Activity Data and Analytics to Address Medical Education's Social Contract", 2017.                                                                                                                                                                                                                                     |   | 1 |   |
| Tsamenyi M., Yaa Antwi-Gyamfi N., "Trashy bags: sustainability crisis of a sustainable business", 2017.                                                                                                                                                                                                                                                         | 1 |   | 1 |
| Tsey K., Whiteside M., Daly S., Deemal A., Gibson T., Cadet-James Y., Wilson A., Santhanam R., Haswell-Elkins M.R., "Adapting the 'Family Wellbeing' empowerment program to the needs of remote Indigenous school children", 2005.                                                                                                                              |   | 1 |   |
| Turcsányi-Szabó M., "Aiming at Sustainable Innovation in Teacher Education-from Theory to Practice", 2012.                                                                                                                                                                                                                                                      |   | 1 | 1 |
| Türk N., Kalaycı N., Yamak H., "New trends in higher education in the globalizing world: STEM in teacher education", 2018.                                                                                                                                                                                                                                      |   | 1 |   |



|                                                                                                                                                                                                                                                                                                                                                |   |   |
|------------------------------------------------------------------------------------------------------------------------------------------------------------------------------------------------------------------------------------------------------------------------------------------------------------------------------------------------|---|---|
| Tuzun U., "Introduction to systems engineering and sustainability PART I: Student-centred learning for chemical and biological engineers", 2020.                                                                                                                                                                                               | 1 |   |
| *Valley W., Wittman H., Jordan N., Ahmed S., Galt R., "An emerging signature pedagogy for sustainable food systems education", 2018.                                                                                                                                                                                                           |   | 1 |
| Varela-Losada M., Arias-Correa A., Vega-Marcote P., "Educate for change and sustainability: Evaluation of an experiential learning proposal to train teachers in initial training [Educar para el cambio y la sostenibilidad: Evaluación de una propuesta de aprendizaje experiencial para formar al profesorado en formación inicial]", 2019. |   | 1 |
| Vega-Marcote P., Varela-Losada M., Álvarez-Suárez P., "Evaluation of an educational model based on the development of sustainable competencies in basic teacher training in Spain", 2015.                                                                                                                                                      | 1 |   |
| Vega-Marcote P., Varela-Losada M., "Basic Teacher Training Oriented Toward Sustainability: Why and How to Carry It Out Today?", 2016.                                                                                                                                                                                                          | 1 |   |
| Velichová D., "Is there a special Maths for engineers?", 2015.                                                                                                                                                                                                                                                                                 |   | 1 |
| Vesisenaho M., Duveskog M., Laisser E., Sutinen E., "Designing a contextualized programming course in a Tanzanian University", 2006.                                                                                                                                                                                                           |   | 1 |
| Vlasova V.P., Neyasova I.A., Karabanova O.N., "Academic physical education and health service to develop socially important qualities in future physical education specialists", 2017.                                                                                                                                                         |   | 1 |
| Vostrikova N., "The model of fundamental chemical training of bachelors of technical and technological directions in the conditions of blended learning", 2019.                                                                                                                                                                                | 1 | 1 |
| Wahlqvist M.L., Li D., Sun J.-Q., Ge K., Paik H.-Y., Cho S.H., Lee S.-K., Huang C.-j., Lee M.-S., "Nutrition leadership training in north-east asia: An IUNS initiative in conjunction with nutrition societies in the region [Chinese Source]", 2008.                                                                                         |   | 1 |
| Wärnestål P., "Formal learning sequences and progression in the studio: A framework for digital design education", 2016.                                                                                                                                                                                                                       | 1 | 1 |
| Warren Flint R., Mccarter W., Bonniwell T., "Interdisciplinary education in sustainability: Links in secondary and higher education: The Northampton Legacy Program", 2000.                                                                                                                                                                    |   | 1 |
| Watkins D., Canto-Lopez M., "Working with law students to develop legal literacy materials", 2016.                                                                                                                                                                                                                                             | 1 |   |
| Weissman J.M., Ferranti A., Laflin K., "Workforce education for renewable energy lessons learned from a national gathering of educators", 2007.                                                                                                                                                                                                |   | 1 |
| Welch-Devine M., Pidaparti R., Carmichael K.P., Rechtman J.E., Walker B.B., Coffield J.A., "Training model for 21st century graduate education through engagement to action", 2018.                                                                                                                                                            |   | 1 |
| Weng S.-S., Liu Y., Dai J., Chuang Y.-C., "A novel improvement strategy of competency for education for sustainable development (ESD) of university teachers based on data mining", 2020.                                                                                                                                                      |   | 1 |
| White D.L., Pargas R.P., Chow A.T., Chong J., Cook M., Tak I., "The vanishing firefly project: Engaging citizen scientists with a mobile technology and real-time reporting framework", 2014.                                                                                                                                                  |   | 1 |
| Whitford D., Smith T., Newbury J., "The South Australian Allied Health Workforce survey: Helping to fill the evidence gap in primary health workforce planning", 2012.                                                                                                                                                                         |   | 1 |
| Williams D., "Transition to transformation in fashion education for sustainability", 2016.                                                                                                                                                                                                                                                     |   | 1 |
| Windish D.M., Gozu A., Bass E.B., Thomas P.A., Sisson S.D., Howard D.M., Kern D.E., "A ten-month program in curriculum development for medical educators: 16 Years of experience", 2007.                                                                                                                                                       |   | 1 |
| Witt C.M., Withers S.R., "Research training in integrative medicine: How can we make teaching and learning in research methods more sustainable and engaging?", 2013.                                                                                                                                                                          | 1 | 1 |
| Wong L.-H., Looi C.-K., Voon X.P., "A rubric for assessing seamlesized science learning lesson plans", 2018.                                                                                                                                                                                                                                   |   | 1 |
| Wong N.H.L., Posner M.T., John P.V., "The Lightwave programme and roadshow: An overview and update", 2015.                                                                                                                                                                                                                                     |   | 1 |
| Wopereis I., Frerejean J., Brand-Gruwel S., "Information problem solving instruction in higher education: A case study on instructional design", 2015.                                                                                                                                                                                         |   | 1 |
| Xu P., Yue X., "Talent leadership strategies enhance teacher's professional competencies in 21st century education for sustainable development", 2019.                                                                                                                                                                                         |   | 1 |
| Yeung S.M.-C., "Linking ISO 9000 (QMS), ISO 26000 (CSR) with accreditation requirements for quality indicators in higher education", 2018.                                                                                                                                                                                                     |   | 1 |

|                                                                                                                                                                                                                                                                                                              |   |   |
|--------------------------------------------------------------------------------------------------------------------------------------------------------------------------------------------------------------------------------------------------------------------------------------------------------------|---|---|
| Zamora-Polo F., Sánchez-Martín J., "Teaching for a better world. Sustainability and Sustainable Development Goals in the construction of a change-maker university", 2019.                                                                                                                                   |   | 1 |
| Zhang B.H., "CK, PCK, TPCK, and non-intellectual factors in sustaining an iMVT innovation for science learning", 2011.                                                                                                                                                                                       | 1 | 1 |
| Zinser R., "A curriculum model of a foundation for educating the global citizens of the future", 2012.                                                                                                                                                                                                       | 1 |   |
| Zoller U., Barak M., Kortam N., "Science education for sustainability: Can a Power Point-based workshop induce a related conceptual change in science teachers? [Educación en ciencias para la sostenibilidad: ¿pueden talleres basados en PP inducir un cambio conceptual en maestros de ciencias?]", 2016. |   | 1 |
